# Supplementary material for: Hydrogen-bonded self-assemblies in a polychlorotriphenylmethyl radical derivative substituted with six meta-carboxylic acid groups
Source: Royal Society of Chemistry journal article supplement (doi:10.1039/b508952b), 2005-01-01
Supplement: b508952b.pdf [file b508952b.pdf]

## Supporting Information

### Hydrogen-bonded self-assemblies in a polychlorotriphenylmethyl radical derivative substituted with six *meta*-carboxylic acid groups.

Nans Roques,<sup>a</sup> Daniel MasPOCH,<sup>a</sup> Neus Domingo,<sup>b</sup> Daniel Ruiz-Molina,<sup>a</sup> Klaus Wurst,<sup>c</sup> Javier Tejada,<sup>b</sup> Concepció Rovira<sup>a</sup> and Jaume Veciana\*<sup>a</sup>.

<sup>a</sup> Institut de Ciència de Materials de Barcelona (CSIC), Campus Universitari, 08193 Bellaterra, Catalonia, Spain. Fax: 34 93 580 5729; Tel: 34 93 580 1853; E-mail: [vecianaj@icmab.es](mailto:vecianaj@icmab.es)

<sup>b</sup> Facultat de Física, Universitat de Barcelona, Diagonal 647, 08208, Barcelona, Spain.

<sup>c</sup> Institut für Allgemeine Anorganische und Theoretische Chemie, Universität Innsbruck, A-6020 Innrain 52a, Austria.

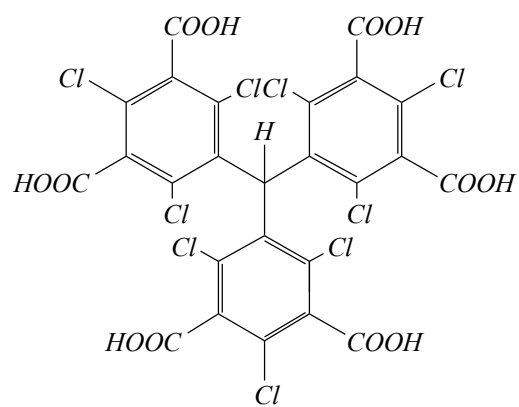

**Scheme S1:** Compound 3

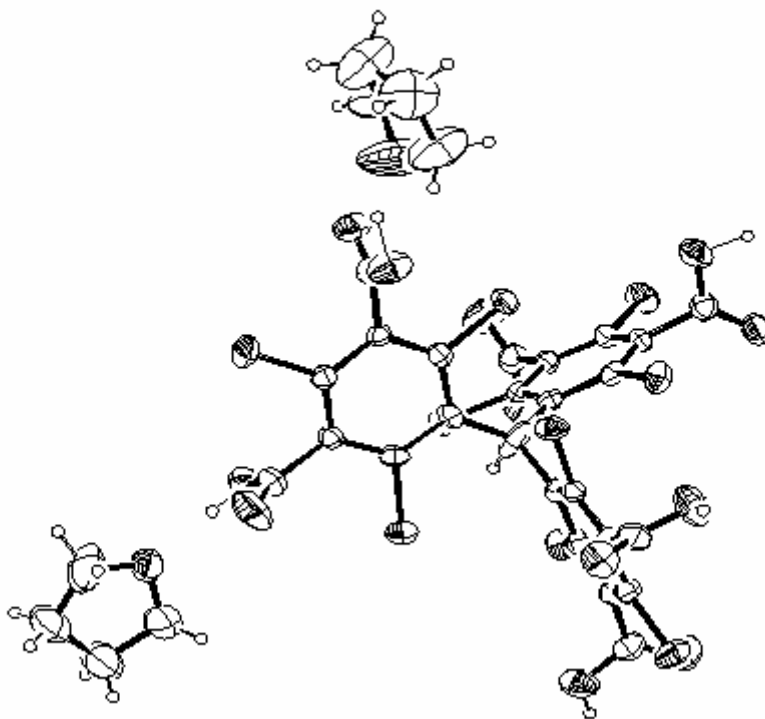

**Figure S1:** ORTEP view of the [3·(THF)<sub>6</sub>] solvate (thermal ellipsoids set at 30% probability).

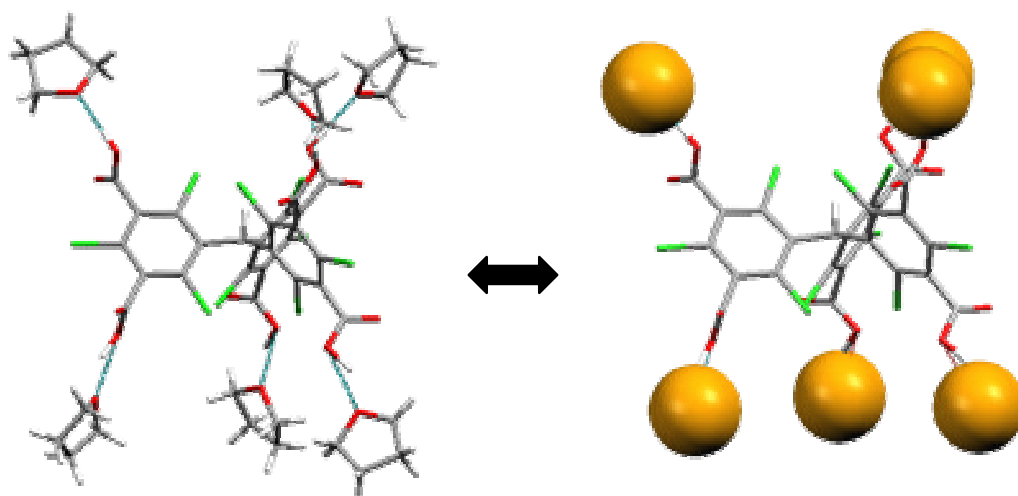

**Figure S2:** Crystal structure of the  $[3(\text{THF})_6]$  solvate. Views of the  $[3(\text{THF})_6]$  supramolecular cluster with real THF molecules (left) or with THF molecules represented as orange spheres (right).

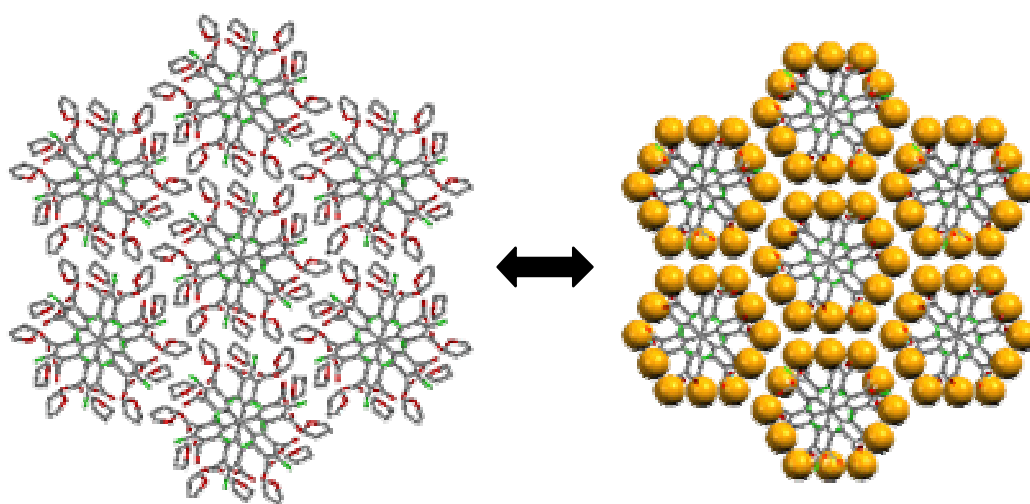

**Figure S3:** Crystal structure of the  $[3(\text{THF})_6]$  solvate. Views along the  $c$  axis of PTMHC-templated honeycomb arrangement of solvent THF molecules (THF molecules of the left part are represented by orange spheres for clarity in the right part).
